# Supplementary material for: Dietary Intake and Beliefs of Pregnant Women with Gestational Diabetes in Cape Town, South Africa
Source: Nutrients. 2018 Aug 28;10(9):1183. doi: 10.3390/nu10091183 (PMC6164942; doi:10.3390/nu10091183)
Supplement: Supplementary file 1 [file nutrients-10-01183-s001.pdf]

**GDM Study**  
**Phase 2: Questionnaire (Cross-sectional Survey)**

Patient sticker

Participant code: .....

Age (years): \_\_\_\_\_

Weeks' gestation: \_\_\_\_\_

Expected due date: \_\_\_\_\_

**Contact details:**

Race:

|       |       |        |          |  |
|-------|-------|--------|----------|--|
| Black | White | Indian | Coloured |  |
|-------|-------|--------|----------|--|

Pregnancy:

|                 |                 |                 |                 |                 |
|-----------------|-----------------|-----------------|-----------------|-----------------|
| 1 <sup>st</sup> | 2 <sup>nd</sup> | 3 <sup>rd</sup> | 4 <sup>th</sup> | 5 <sup>th</sup> |
|-----------------|-----------------|-----------------|-----------------|-----------------|

No of children:

|   |   |   |   |   |   |
|---|---|---|---|---|---|
| 0 | 1 | 2 | 3 | 4 | 5 |
|---|---|---|---|---|---|

**Inclusion criteria:**

18 years or older

≥28 week gestation

GDM or IGT

**Section A**

**Please tick next to the correct answer**

|                                                                                                   |                       |  |
|---------------------------------------------------------------------------------------------------|-----------------------|--|
| 1. Did you have diabetes with your previous pregnancy?                                            | Yes                   |  |
|                                                                                                   | No                    |  |
|                                                                                                   | N/A                   |  |
| 2. How would you rate your health so far during this pregnancy?                                   | Excellent             |  |
|                                                                                                   | Good                  |  |
|                                                                                                   | Fair                  |  |
|                                                                                                   | Poor                  |  |
| 3. How happy were you with your weight before pregnancy? Tick                                     | Happy                 |  |
|                                                                                                   | Somewhat happy        |  |
|                                                                                                   | Unhappy               |  |
| 4. Do you think your weight gain during this pregnancy is:                                        | Too little            |  |
|                                                                                                   | Just right            |  |
|                                                                                                   | Too much              |  |
| 5. How would you rate your current level of physical activity:                                    | Very inactive         |  |
|                                                                                                   | Inactive              |  |
|                                                                                                   | Active                |  |
|                                                                                                   | Very active           |  |
| 6. What do you think of the food choices you make most of the time (on 4 or more times per week): | Mostly very healthy   |  |
|                                                                                                   | Mostly healthy        |  |
|                                                                                                   | Mostly unhealthy      |  |
|                                                                                                   | Mostly very unhealthy |  |
| 7. Do you suffer from high blood pressure?                                                        | Yes                   |  |
|                                                                                                   | No                    |  |

|                                                                                           |                                                     |  |
|-------------------------------------------------------------------------------------------|-----------------------------------------------------|--|
| 8. How many fruit do you eat (1 fruit = 1 med or 2 small)                                 | Per day OR                                          |  |
|                                                                                           | Per week                                            |  |
| 9. How many vegetables do you eat (1 veg = ½ cup)                                         | Per day OR                                          |  |
|                                                                                           | Per week                                            |  |
| 10. If a wellness programme was available for pregnant women, would you enrol?            | Yes                                                 |  |
|                                                                                           | No                                                  |  |
| 11. What is the preferred way you would like to receive information on health/ nutrition? | One-on-one session/<br>individual                   |  |
|                                                                                           | Group session                                       |  |
|                                                                                           | Print material (poster,<br>pamphlet, booklets etc.) |  |
|                                                                                           | Social media (internet, sms<br>etc.)                |  |

### Section B: LSM calculation

NB! Please tick the items in the table below that you have in your household

| ITEM                                     | tick | ITEM                               | tick |
|------------------------------------------|------|------------------------------------|------|
| House/ property worth (250 000) or more  |      | Dishwashing machine                |      |
| DVD Player/ Blu Ray player               |      | Tumble dryer                       |      |
| Living in a non-urban area               |      | Home security service              |      |
| Refrigerator or combined fridge/ freezer |      | Pay TV (M-net, DSTV, TOP TV)       |      |
| House/ cluster house/ town house         |      | 2 cell phones in household         |      |
| Electric stove                           |      | Home theatre system                |      |
| Tap water in house/ on plot              |      | 3 or more cell phones in household |      |
| Microwave oven                           |      | Vacuum cleaner                     |      |
| Flush toilet inside house                |      | 0 or 1 radio set in household      |      |
| Deep freezer – free standing             |      | Motor vehicle in household         |      |
| Hot running water                        |      | Air conditioner (excludes fans)    |      |
| Washing machine                          |      | Computer- desktop, laptop          |      |
| Built in kitchen sink                    |      | 1or more TVs                       |      |
| No domestic workers or gardeners         |      | Landline (exclude. cell phone)     |      |
| Swimming pool                            |      |                                    |      |

### Section C: Belief statements

#### Fruit and vegetable intake

|                                                                                                  |                              |
|--------------------------------------------------------------------------------------------------|------------------------------|
| Eating fruits and vegetables every day will make me feel better physically.                      | Disagree—1—2—3—4—5—6—7-Agree |
| Eating fruits and vegetables every day will help control my weight.                              | Disagree—1—2—3—4—5—6—7-Agree |
| Eating less fruit will help control my blood sugar levels (i.e. to reduce the risk of diabetes). | Disagree—1—2—3—4—5—6—7-Agree |
| Vegetables do not take a long time to prepare                                                    | Disagree—1—2—3—4—5—6—7-Agree |
| Fruits and vegetables are affordable.                                                            | Disagree—1—2—3—4—5—6—7-Agree |
| Fruits and vegetables are easy to find in the stores/ shops nearby.                              | Disagree—1—2—3—4—5—6—7-Agree |
| I am confident that I can eat the recommended amount of fruits and vegetables every day.         | Disagree—1—2—3—4—5—6—7-Agree |
| Most people who are important to me eat fruits and vegetables every day.                         | Disagree—1—2—3—4—5—6—7-Agree |

| Sugar                                                                                                                                        |                              |
|----------------------------------------------------------------------------------------------------------------------------------------------|------------------------------|
| Eating less sugary foods/snacks/ drinks will help reduce the risk of diseases e.g. diabetes.                                                 | Disagree—1—2—3—4—5—6—7-Agree |
| It is also important to limit my intake of sugary foods/snacks/drinks after the pregnancy.                                                   | Disagree—1—2—3—4—5—6—7-Agree |
| Decreasing the amount of sugary foods/snacks/ drinks I eat will help control my weight.                                                      | Disagree—1—2—3—4—5—6—7-Agree |
| Increasing the amount sugary foods/snacks/drinks I eat and drink make me feel unwell (tired, headache, dizzy, signs of hyper glycaemia etc). | Disagree—1—2—3—4—5—6—7-Agree |
| I want to reduce the amount of sugary foods/snacks/ drinks I eat and drink to prevent pregnancy/ birth complications.                        | Disagree—1—2—3—4—5—6—7-Agree |
| It is easy to exclude sugary foods/snacks/drinks from my daily diet.                                                                         | Disagree—1—2—3—4—5—6—7-Agree |
| Foods/snacks/drinks that are low sugar/ sugar free are easy to find in my surroundings.                                                      | Disagree—1—2—3—4—5—6—7-Agree |
| Eating/drinking less sugary foods/snacks/drinks is up to me.                                                                                 | Disagree—1—2—3—4—5—6—7-Agree |
| Knowing how to control my cravings for sugary foods/snacks/ drinks during pregnancy will make it easier for me to eat less of these foods.   | Disagree—1—2—3—4—5—6—7-Agree |
| Low sugar/ sugar-free foods/snacks/ drinks are expensive.                                                                                    | Disagree—1—2—3—4—5—6—7-Agree |
| Low sugar/ sugar-free foods taste good/ are tasty.                                                                                           | Disagree—1—2—3—4—5—6—7-Agree |
| People around me eat/serve sugary foods/snacks/drinks at most events/ functions (social, religious, or work events)                          | Disagree—1—2—3—4—5—6—7-Agree |

#### Section D: Dietary intake assessment

NB! Think back to the last two weeks and divide the food cards into two piles i.e. foods you did eat and foods you did not eat.

| A. Food Item (with FMP numbers)     | B. Description of food item                         | C. Amount consumed | D. Portion size                       | E. Times/day | F. Times/week |
|-------------------------------------|-----------------------------------------------------|--------------------|---------------------------------------|--------------|---------------|
| <b>DAIRY – BLUE</b>                 |                                                     |                    |                                       |              |               |
| 1. Sugar in tea/coffee              |                                                     |                    | Tbs/tsp heaped/level                  |              |               |
| 1. Sugar in cooking (veg/ porridge) |                                                     |                    | Tbs/tsp heaped/level                  |              |               |
| 2. Milk in tea/coffee               | Full cream / low fat (2%)/ fat-free                 |                    | Little / milky                        |              |               |
| 2.Milk with porridge                | Full cream/ low fat (2%)/ fat-free                  |                    |                                       |              |               |
| 3. Buttermilk/maas                  |                                                     |                    | Small or large glass                  |              |               |
| 4. Milk drinks                      |                                                     |                    | Small or large glass or ml            |              |               |
| 5. Yoghurt                          | Plain / fruit & sweetened<br>Fat: full / low / free |                    | 100ml tub/ 180ml tub/ heaped Tbs      |              |               |
| 6. Cottage cheese                   | Fat: full / low / free                              |                    | Heaped Tbs                            |              |               |
| 7. Hard Cheese                      | Type                                                |                    | Slice / matchbox                      |              |               |
| 8. Processed cheese                 | Type                                                |                    | Wedges/Tbs                            |              |               |
| 9. Ice cream & Ice lollies          | Type                                                |                    | Scoops or heaped Tbs or nr of lollies |              |               |
| <b>STARCH - BROWN</b>               |                                                     |                    |                                       |              |               |
| 1. Brown bread/rolls                |                                                     |                    | Slice                                 |              |               |
| 1. White bread/rolls                |                                                     |                    | Slice                                 |              |               |
| 2. Whole wheat /Low GI bread        |                                                     |                    | Slice                                 |              |               |

| <i>A. Food Item (with FMP numbers)</i> | <i>B. Description of food item</i>               | <i>C. Amount consumed</i> | <i>D. Portion size</i>                                          | <i>E. Times/day</i> | <i>F. Times/week</i> |
|----------------------------------------|--------------------------------------------------|---------------------------|-----------------------------------------------------------------|---------------------|----------------------|
| 2. Fat cakes                           |                                                  |                           | Small = 1 matchbox;<br>Med = 2 matchboxes<br>Lrg = 3 matchboxes |                     |                      |
| 3. Breakfast cereals                   | Specify type                                     |                           | ½ or ¾ of a Bowl                                                |                     |                      |
| 4. Maize porridge soft                 |                                                  |                           | Bowl                                                            |                     |                      |
| 4. Maize porridge stiff                |                                                  |                           | Bowl                                                            |                     |                      |
| 4. Mabele/martabella soft              |                                                  |                           | Bowl                                                            |                     |                      |
| 4. Mabele/ stiff                       |                                                  |                           | Bowl                                                            |                     |                      |
| 4. Oats                                |                                                  |                           | Bowl                                                            |                     |                      |
| 5. Pasta without sauce                 | White/ brown pasta                               |                           | Heaped serving spoon                                            |                     |                      |
| 6. Pasta dishes                        | White/ brown pasta                               |                           | Heaped serving spoon                                            |                     |                      |
| 7. Rice                                | White/brown                                      |                           | Heaped serving spoon<br>½ cup dough model                       |                     |                      |
| 7. Samp/mealie meal                    |                                                  |                           | Heaped serving spoon<br>½ cup dough model                       |                     |                      |
| 7. Wheat rice                          |                                                  |                           | Heaped serving spoon<br>½ cup dough model                       |                     |                      |
| 8. Pizza and savoury tart              | Type                                             |                           | ? pic in file                                                   |                     |                      |
| <b>FATS - TAN</b>                      |                                                  |                           |                                                                 |                     |                      |
| 1. Brick margarine                     | Type                                             |                           | Tbs/tsp heaped/level                                            |                     |                      |
| 1. Tub margarine                       | Type                                             |                           | Tbs/tsp heaped/level                                            |                     |                      |
| 1. White margarine                     | Type                                             |                           | Tbs/tsp heaped/level                                            |                     |                      |
| 1. Butter                              | Type                                             |                           | Tbs/tsp heaped/level                                            |                     |                      |
| 2. Animal fat i.e lard                 |                                                  |                           |                                                                 |                     |                      |
| 3. Cream and substitutes               |                                                  |                           | Tbs/tsp                                                         |                     |                      |
| 4. Oils                                | Sunflower / fish oil /<br>canola oil / olive oil |                           | Tbs/tsp                                                         |                     |                      |
| 5. Salad dressing                      |                                                  |                           | Tbs/tsp                                                         |                     |                      |
| 5. Mayonnaise                          |                                                  |                           | Tbs/tsp                                                         |                     |                      |
| <b>SPREADS - PINK</b>                  |                                                  |                           |                                                                 |                     |                      |
| Cheese spread                          | Type                                             |                           | Thin / med /thick                                               |                     |                      |
| Honey/syrup                            |                                                  |                           | Heaped Tbs/tsp                                                  |                     |                      |
| Jam                                    | Regular/low sugar                                |                           | Heaped Tbs/tsp                                                  |                     |                      |
| Peanut butter                          | Regular/no sugar                                 |                           | Heaped Tbs/tsp                                                  |                     |                      |
| Sandwich spread                        | Type                                             |                           | Heaped Tbs/tsp                                                  |                     |                      |
| <b>EGGS - YELLOW</b>                   |                                                  |                           |                                                                 |                     |                      |
| Boiled                                 |                                                  |                           | 1 egg                                                           |                     |                      |
| Fried                                  |                                                  |                           | 1 egg                                                           |                     |                      |
| Omelette                               |                                                  |                           | 1egg                                                            |                     |                      |

| <i>A. Food Item (with FMP numbers)</i>  | <i>B. Description of food item</i>            | <i>C. Amount consumed</i> | <i>D. Portion size</i>            | <i>E. Times/day</i> | <i>F. Times/week</i> |
|-----------------------------------------|-----------------------------------------------|---------------------------|-----------------------------------|---------------------|----------------------|
| Scrambled                               |                                               |                           | 1 egg                             |                     |                      |
| <b>FRUIT - ORANGE</b>                   |                                               |                           |                                   |                     |                      |
| 1. Apples, pears                        |                                               |                           | Small / med /large                |                     |                      |
| 2. Bananas                              |                                               |                           | Small / med /large                |                     |                      |
| 6. Grapes                               |                                               |                           | Nr of grapes                      |                     |                      |
| 8. Mango/paw paw                        |                                               |                           |                                   |                     |                      |
| 9. Melons                               |                                               |                           |                                   |                     |                      |
| 11. Oranges, Naartjies                  |                                               |                           | Small / med /large                |                     |                      |
| 12. Peaches                             |                                               |                           | Small / med /large                |                     |                      |
| 16. Dried fruit                         |                                               |                           |                                   |                     |                      |
| 17. Fruit juice                         | Type                                          |                           | ml or small glass or tall glass   |                     |                      |
| <b>SOUP, LEGUMES, NUTS – pale green</b> |                                               |                           |                                   |                     |                      |
| 1. Soups                                |                                               |                           | Ladle/bowl                        |                     |                      |
| 2. Legumes & lentils                    |                                               |                           | ½ cup dough model                 |                     |                      |
| 3. Seeds & nuts, peanuts                |                                               |                           | Handful                           |                     |                      |
| <b>FISH AND SEAFOOD - BEIGE</b>         |                                               |                           |                                   |                     |                      |
| 1. Fried fish                           |                                               |                           | Per picture                       |                     |                      |
| 2. Grilled/smoked/dried fish            | Type                                          |                           | Per picture                       |                     |                      |
| 3. Pilchards & sardines                 | In oil/brine/t. sauce                         |                           | Tin                               |                     |                      |
| 3. Tuna - tinned                        | In oil/brine                                  |                           | Tin                               |                     |                      |
| <b>MEAT - RED</b>                       |                                               |                           |                                   |                     |                      |
| 1. Beef & Ostrich                       | Cut                                           |                           | Matchbox                          |                     |                      |
| 2. Patties & mince                      | Type: beef/ostrich<br>Regular/lean/extra-lean |                           | Small/medium                      |                     |                      |
| 3. Burgers & take-aways                 | Grilled/fried                                 |                           |                                   |                     |                      |
| 4. Chicken – with skin                  | Grilled/fried                                 |                           | Thigh / wing / drumstick / breast |                     |                      |
| 4. Chicken – without skin               | Grilled/fried                                 |                           | Thigh / wing / drumstick / breast |                     |                      |
| 5. Cold meat                            | Type                                          |                           | slice                             |                     |                      |
| 7. Meat pies                            | Type                                          |                           | Size - ruler                      |                     |                      |
| 8. Mutton                               | Type                                          |                           | Line drawings                     |                     |                      |
| 9. Pork                                 | Type                                          |                           | Line drawings                     |                     |                      |
| 10. Sausage & Vienna                    | Type                                          |                           | Ruler and thick or thin           |                     |                      |
| 11. Traditional & organ meats           | Type                                          |                           |                                   |                     |                      |
| 13. Dry sausage & biltong               | Type                                          |                           |                                   |                     |                      |
| <b>VEGETABLES - GREEN</b>               |                                               |                           |                                   |                     |                      |
| Avocado                                 |                                               |                           | ½ or ¼ etc.                       |                     |                      |
| 5. Orange/yellow veg (butternut,        |                                               |                           | ½ cup dough model                 |                     |                      |

| <i>A. Food Item (with FMP numbers)</i>               | <i>B. Description of food item</i> | <i>C. Amount consumed</i> | <i>D. Portion size</i>                    | <i>E. Times/day</i> | <i>F. Times/week</i> |
|------------------------------------------------------|------------------------------------|---------------------------|-------------------------------------------|---------------------|----------------------|
| pumpkin, carrots, sweet potato, gem squash, mealies) |                                    |                           |                                           |                     |                      |
| 6. Green veg (spinach, peas, green beans, broccoli)  |                                    |                           | ½ cup dough model                         |                     |                      |
| 7. Cabbage, cauliflower, lettuce                     |                                    |                           | ½ cup dough model                         |                     |                      |
| 12. Mixed vegetables                                 |                                    |                           | ½ cup dough model                         |                     |                      |
| 15. Potatoes                                         |                                    |                           | Nr med                                    |                     |                      |
| 16. Potato chips                                     |                                    |                           | ½ cup dough model                         |                     |                      |
| 20. Tomatoes                                         |                                    |                           | Nr or ½ cup                               |                     |                      |
| <b>BISCUITS, CAKES, PUDDINGS</b>                     |                                    |                           |                                           |                     |                      |
| 1. Biscuits/cookies                                  | Type                               |                           | nr                                        |                     |                      |
| 2. Biscuits/savoury                                  | Type                               |                           | nr                                        |                     |                      |
| 3. buns/muffins/scones                               | Type                               |                           | Picture in file                           |                     |                      |
| 4. Cakes and tarts                                   | Type                               |                           | Line drawings                             |                     |                      |
| 5. Doughnuts/éclairs                                 | Type                               |                           | nr                                        |                     |                      |
| 6. Pancakes/waffles                                  | Type                               |                           | nr                                        |                     |                      |
| 7. Pudding/custard                                   | Type                               |                           | bowl                                      |                     |                      |
| 8. Rusks                                             |                                    |                           | nr                                        |                     |                      |
| <b>SNACKS, SWEETS &amp; COLD DRINKS - PINK</b>       |                                    |                           |                                           |                     |                      |
| 1. Carbonated cold drinks                            | Specify                            |                           | ml or tin or small glass or tall glass    |                     |                      |
| 1. Diet cold drinks                                  | Specify                            |                           | ml or tin or small glass or tall glass    |                     |                      |
| 2. Energy drinks                                     | Specify                            |                           | ml or tin or small glass or tall glass    |                     |                      |
| 2. Squashes                                          | Specify                            |                           | ml or tin or small glass or tall glass    |                     |                      |
| 3. Crisps                                            | Specify                            |                           | small packet – 40g                        |                     |                      |
| 4. Sweets                                            | Specify                            |                           | nr                                        |                     |                      |
| 4. Chocolates                                        | Specify                            |                           | 50g bar or slab or nr of blocks from slab |                     |                      |
| <b>SAUCES AND CONDIMENTS - GRAY</b>                  |                                    |                           |                                           |                     |                      |
| 1. Cheese and white sauces                           | Specify                            |                           | Tbs                                       |                     |                      |
| 2. Tomato sauce & other                              | Specify                            |                           | Tbs                                       |                     |                      |
| <b>ALCOHOLIC DRINKS - GRAY</b>                       |                                    |                           |                                           |                     |                      |
| 1. Beer & cider & coolers                            |                                    |                           | ml/bottles/shots                          |                     |                      |
| 2. Wine                                              |                                    |                           | ml/bottles/shots                          |                     |                      |
| 3. Spirits                                           |                                    |                           | ml/bottles/shots                          |                     |                      |
| 4. Liqueurs and fortified wine                       |                                    |                           | ml/bottles/shots                          |                     |                      |
| Other                                                |                                    |                           | ml/bottles/shots                          |                     |                      |

| <i>A. Food Item (with FMP numbers)</i> | <i>B. Description of food item</i> | <i>C. Amount consumed</i> | <i>D. Portion size</i> | <i>E. Times/day</i> | <i>F. Times/week</i> |
|----------------------------------------|------------------------------------|---------------------------|------------------------|---------------------|----------------------|
|                                        |                                    |                           |                        |                     |                      |

Section E: Physical activity (GPPAQ)

**1. Please tell us the type and amount of physical activity involved in your work. Please tick one box only.**

|                                                                                                                                                                                                        |  |
|--------------------------------------------------------------------------------------------------------------------------------------------------------------------------------------------------------|--|
| I am not employed (e.g. retired, retired for health reasons, unemployed, full-time carer etc.)                                                                                                         |  |
| I spend most of my time at work sitting (such as in an office)                                                                                                                                         |  |
| I spend most of my time at work standing or walking. However, my work did not require much intense physical effort (e.g. shop assistant, hairdresser, security guard, childminder, etc.)               |  |
| My work involves definite physical effort including handling of heavy objects and use of tools (e.g. plumber, electrician, carpenter, cleaner, hospital nurse, gardener, postal delivery workers etc.) |  |
| My work involves vigorous physical activity including handling of very heavy objects (e.g. scaffolder, construction worker, refuse collector, etc.)                                                    |  |

**2. During the last week, how many hours did you spend on each of the following activities?**

|                                                                                           | <b>None</b> | <b>Some but less than 1 hour</b> | <b>1 hour but less than 3 hours</b> | <b>3 hours or more</b> |
|-------------------------------------------------------------------------------------------|-------------|----------------------------------|-------------------------------------|------------------------|
| Physical exercise such as swimming, jogging, aerobics, football, tennis, gym workout etc. |             |                                  |                                     |                        |
| Cycling, including cycling to work and during leisure time                                |             |                                  |                                     |                        |
| Walking, including walking to work, shopping, for pleasure etc.                           |             |                                  |                                     |                        |
| Housework/Childcare                                                                       |             |                                  |                                     |                        |
| Gardening/DIY                                                                             |             |                                  |                                     |                        |
